# Supplementary material for: Prevalence and outcomes of co-infection and superinfection with SARS-CoV-2 and other pathogens: A systematic review and meta-analysis
Source: PLoS One. 2021 May 6;16(5):e0251170. doi: 10.1371/journal.pone.0251170 (PMC8101968; doi:10.1371/journal.pone.0251170)
Supplement: S4 File — (XLSX) [file pone.0251170.s007.xlsx]

## Sheet: S4 File
study	year	study_design	country	setting	inpatient	num_pts	bactnum	age group	pct_male	pct_icu	numb_vent	num_icu	coinfect	coinfect2	coninfnum	con_or_sup	notconinfnum	superinfect	superinfect2	superinfnum	coinf-and- superinf	virusnum	virus_seen	bactnum2	bact_seen	fungnum	fung_seen	asperg_seen	asperg_numb	unknworg	pseudomonas	efaecium	staph	hinfluenza	mycoplasm	acinetobacspps	ecoli	stenotropho	kpneumo	candidaspps	flua	flub	rsv	parainflu	ebv	other_cov	strepa	hmpv	rhinovirus
Arentz	2020	case series	USA	ICU	1	21	1	Adults	52	100	15	21	0	No	0	Superinfection	21	1	Yes	4	4	3	1	1	1	0	0	0	0	1	0	0	0	0	0	0	0	0	0	0	0	0	0	0	0	0	0	0	0
Barrasa	2020	case series	Spain	ICU	1	48	6	Adults	56	100	45	48	0	No	0	Superinfection	48	1	Yes	6	6	0	0	6	1	0	0	0	0	0	3	1	1	1	0	0	0	0	0	0	0	0	0	0	0	0	0	0	0
Campochiaro	2020	prospective cohort	Italy	ICU and non-ICU	1	65	4	Adults	29	6	25	4	0	No	0	Superinfection	65	1	Yes	8	8	0	1	4	1	0	0	1	1	1	0	0	0	0	0	0	0	0	0	0	0	0	0	0	0	0	0	0	0
Chen	2020	case series	China	ICU	1	99	1	Adults	68	100	17		1	Yes	5	Co-infection	94	0	No	0	5	0	0	1	1	4	1	1	1	0	0	0	0	0	0	1	0	0	1	4	0	0	0	0	0	0	0	0	0
Cuadrado-Payán	2020	case series	Spain	ICU	1	4	0	Adults	75	75	3	3	1	Yes	4	Co-infection	0	0	No	0	4	4	1	0	0	0	0	0	0	0	0	0	0	0	0	0	0	0	0	0	3	2	0	0	0	0	0	0	0
Ding	2020	case series	China	Non-ICU	1	115	0	Adults		0	0	0	1	Yes	5	Co-infection	110	0	No	0	5	5	1	0	0	0	0	0	0	0	0	0	0	0	0	0	0	0	0	0	3	2	0	0	0	0	0	0	0
Dong	2020	case series	China	Non-ICU	1	11	0	Adults/Children	54	0	1	0	1	Yes	2	Co-infection	9	0	No	1	3	1	0	0	0	0	0	0	0	1	0	0	0	0	0	0	0	0	0	0	0	0	0	0	0	0	0	0	0
Du	2020	case series	China	ICU	1	109		Adults	67.9	48.6	33	51	0	No	0	Superinfection	109	1	Yes	42	42	0	0		1		1	0	0	1	0	0	0	0	0	0	0	0	0	0	0	0	0	0	0	0	0	0	0
Fan	2020	retrospective cohort	China	ICU and non-ICU	1	50	5	Adults	83	54	23	27	0	No	0	Superinfection	50	1	Yes	10	10	0	0	5	1	5	1	0	0	1	0	0	0	0	0	0	0	0	0	0	0	0	0	0	0	0	0	0	0
Feng	2020	case series	China	ICU and non-ICU	1	476	35	Adults	56.9	26	70	124	0	No	0	Superinfection	476	1	Yes	35	35	0	0	35	1	0	0	0	0	1	0	0	0	0	0	0	0	0	0	0	0	0	0	0	0	0	0	0	0
Garazzino	2020	retrospective cohort	Italy	ICU and non-ICU	1	168	1	Children	55.9	1.1	2	2	1	Yes	10	Co-infection	158	0	No	0	10	10	1	1	1	0	0	0	0	0	0	0	0	0	0	0	0	0	0	0	1	0	3	0	2	1	1	0	0
Gayam	2020	case series	USA	ICU and non-ICU	1	350	6	Adults	33				1	Yes	6	Co-infection	344	0	No	0	6	0	0	6	1	0	0	0	0	0	0	0	0	0	0	0	0	0	0	0	0	0	0	0	0	0	0	0	0
Huang	2020	case series	China	ICU and non-ICU	1	41	4	Adults	73	32	4	13	0	No	0	Superinfection	41	1	Yes	4	4	0	0	4	1	0	0	0	0	1	0	0	0	0	0	0	0	0	0	0	0	0	0	0	0	0	0	0	0
Kakuya	2020	case series	Japan	Non-ICU	1	3	0	Children	100	0	0	0	1	Yes	2	Co-infection	1	0	No	0	2	2	1	0	0	0	0	0	0	0	0	0	0	0	0	0	0	0	0	0	2	0	0	0	0	0	0	2	0
Khodamoradi	2020	case series	Iran	Non-ICU	1	4	0	Adults	75	0	0	0	1	Yes	4	Co-infection	0	0	No	0	4	4	1	0	0	0	0	0	0	0	0	0	0	0	0	0	0	0	0	0	4	0	0	0	0	0	0	0	0
Kim	2020	retrospective cohort	USA	Non-ICU	0	115	0	Adults/Children	45	0	0	0	1	Yes	25	Co-infection	90	0	No	0	25	25	1	0	0	0	0	0	0	0	0	0	0	0	0	0	0	0	0	0	1	0	6	3	0	5	0	2	8
Koehler	2020	case series	Germany	ICU	1	19	0	Adults		100		19	0	No	0	Superinfection	19	1	Yes	5	5	2	1	0	0	5	1	1	5	0	0	0	0	0	0	0	0	0	0	0	0	0	0	0	0	0	0	2	0
Lian	2020	retrospective cohort	China	ICU and non-ICU	1	788	0	Adults/Children	52		18	22	1	Yes		Co-infection		0	No	0	0			0	0	0	0	0	0	0	0	0	0	0	0	0	0	0	0	0	0	0	0	0	0	0	0	0	0
Lin	2020	case series	China	ICU and non-ICU	1	92		Adults					1	Yes	6	Co-infection	86	0	No		6	6	1		0			0	0		0	0	0	0	0	0	0	0	0	0	0	0	3	0	0	1	0	1	0
Liu	2020	retrospective cohort	China	ICU and non-ICU	1	12	2	Adults/Children	66		6		1	Yes	2	Co-infection	10	0	No		2	0	0	2	1	0	0	0	0	1	0	0	0	0	0	0	0	0	0	0	0	0	0	0	0	0	0	0	0
Lv	2020	retrospective cohort	China	ICU and non-ICU	1	354	32	Adults	49				0	No	0	Superinfection	354	1	Yes	23	23	1	1	32	1	6	1	0	0	0	4	2	4	0	2	9	9	2	0	6	0	0	0	0	0	0	0	0	0
Ma	2020	retrospective cohort	China	ICU and non-ICU	1	93	0	Adults	55				1	Yes	46	Co-infection	47	0	No	0	46	46	1	0	0	0	0	0	0	0	0	0	0	0	0	0	0	0	0	0	44	2	0	0	0	0	0	0	0
Mannheim	2020	case series	USA	ICU and non-ICU	0	64	1	Children	56	11		7	1	Yes	4	Co-infection	60	0	No	0	4	3	1	1	1	0	0	0	0	0	0	0	0	0	1	0	1	0	0	0	0	0	0	0	0	0	0	0	1
Mo	2020	case series	China	ICU and non-ICU	1	155	2	Adults	55		36		1	Yes	12	Co-infection	143	0	No	0	12	13	1	2	1	0	0	0	0	0	0	0	0	0	2	0	0	0	0	0	2	2	3	0	0	0	0	0	0
Nowak	2020	case series	USA	ICU and non-ICU	0	1204	0	Adults	56				1	Yes	36	Co-infection	1168	0	No	0	36	36	1	0	0	0	0	0	0	0	0	0	0	0	0	0	0	0	0	0	1	0	4	0	0	17	0	4	8
Ozaras	2020	case series	Turkey	ICU and non-ICU	0	1103	0	Adults	50				1	Yes	6	Co-infection	1097	0	No	0	6	6	1	0	0	0	0	0	0	0	0	0	0	0	0	0	0	0	0	0	2	5	0	0	0	0	0	0	0
Palmieri	2020	retrospective cohort	Italy	ICU and non-ICU	1	3032		Adults/Children	67				0	No		Superinfection		1	Yes	364	364				0			0	0		0	0	0	0	0	0	0	0	0	0	0	0	0	0	0	0	0	0	0
Peng	2020	retrospective cohort	China	ICU and non-ICU	1	75	31	Children	58				1	Yes	42	Co-infection	33	0	No	0	42	8	1	31	1	0	0	0	0	0	0	0	1	0	28	0	0	0	0	0	1	3	1	0	0	0	0	0	0
Pongpirul	2020	case series	Thailand	ICU and non-ICU	1	11	5	Adults	54		0		1	Yes	6	Co-infection	5	0	No	0	6	2	1	5	1	0	0	0	0	0	0	0	0	4	0	0	0	0	0	0	1	0	0	0	0	0	0	0	0
Richardson	2020	case series	USA	ICU and non-ICU	1	5700	3	Adults	60	14.2	1151	373	1	Yes	42	Co-infection	5658	0	No	0	42	39	1	3	1	0	0	0	0	0	0	0	0	0	1	0	0	0	0	0	1	0	4	0	0	7	0	2	22
Sun	2020	retrospective cohort	China	ICU and non-ICU	1	36	1	Children	61				1	Yes	0	Co-infection	36	0	No	0	0	1	1	1	1	0	0	0	0	0	0	0	0	0	1	0	0	0	0	0	1	0	0	0	0	0	0	0	0
Tagarro	2020	retrospective cohort	Spain	ICU and non-ICU	1	41	0	Children	44	9.7	4	4	1	Yes	2	Co-infection	39	0	No	0	2	2	1	0	0	0	0	0	0	0	0	0	0	0	0	0	0	0	0	0	0	2	0	0	0	0	0	0	0
Wan	2020	case series	China	ICU and non-ICU	1	135		Adults	53		28		0	No	0	Superinfection	135	1	Yes	7	7				0			0	0		0	0	0	0	0	0	0	0	0	0	0	0	0	0	0	0	0	0	0
Wang, Y.	2020	case series	China	ICU and non-ICU	1	55	1	Adults	40	0	0	0	0	No	0	Superinfection	55	1	Yes	4	4	1	1	1	1	1	0	0	0	0	0	0	0	0	1	0	0	0	0	0	0	0	0	0	1	0	0	0	0
Wang, L.	2020	case series	China	ICU and non-ICU	1	339	1	Adults	49				0	No	0	Superinfection	339	1	Yes	143	143	0	0	1	0	1	0	0	0	0	0	0	0	0	0	0	0	0	0	0	0	0	0	0	0	0	0	0	0
Wang, R.	2020	case series	China	ICU and non-ICU	1	125	9	Adults	56.8	15.2	4	19	0	No	1	Superinfection	124	1	Yes	71	72	1	1	9	1	9		0	0		0	0	0	0	1	0	0	0	0	0	0	0	0	0	0	0	0	0	0
Wang, Y.	2020	clinical trial	China	ICU and non-ICU	1	237		Adults	56		21		0	No		Superinfection		1	Yes	11	11				0			0	0		0	0	0	0	0	0	0	0	0	0	0	0	0	0	0	0	0	0	0
Wee	2020	prospective cohort	Singapore	ICU and non-ICU	1	3807		Adults					1	Yes	6	Co-infection	3801	0	No		6	3	1		0			0	0		0	0	0	0	0	0	0	0	0	0	0	0	0	2	0	1	0	0	3
Wu, C.	2020	retrospective cohort	China	ICU and non-ICU	1	201	0	Adults	63.7	26.4	67	53	1	Yes	1	Co-infection	200	0	No		1	1	1	0	0	0	0	0	0	0	0	0	0	0	0	0	0	0	0	0	0	0	0	0	0	0	0	0	0
Xia	2020	case series	China	ICU and non-ICU	1	20	1	Children	65		0		1	Yes	8	Co-infection	12	0	No		8	4	1	1	1	1		0	0		0	0	0	0	4	0	0	0	0	0	1	2	0	0	0	0	0	0	0
Yang, X.	2020	case series	China	ICU	1	710	4	Adults	67	100	37	52	0	No	0	Superinfection	0	1	Yes	7	7	0	0	4	1	4	1	1	5	1	1	0	0	0	0	2	0	0	2	1	0	0	0	0	0	0	0	0	0
Yi	2020	case series	USA	ICU and non-ICU	1	132		Adults	62	50	5	7	1	Yes	7	Co-infection	125	0	No	0	7				0			0	0		0	0	0	0	0	0	0	0	0	0	0	0	0	0	0	0	0	0	0
Zhang, J.	2020	case series	China	ICU and non-ICU	1	140	1	Adults	50.7				1	Yes	3	Co-infection	137	0	No		3	2	1	1	1	1		0	0		0	0	0	0	5	0	0	0	0	0	0	0	1	0	1	0	0	0	0
Zhao	2020	case series	China	ICU and non-ICU	1	34	1	Adults	57.9	0	0	0	1	Yes	2	Co-infection	0	0	No	0	2	1	1	1	1	0	0	0	0	0	0	0	0	0	0	0	0	0	0	0	0	0	0	0	0	0	0	0	0
Zheng	2020	case series	China	ICU and non-ICU	0	1001		Adults/Children					1	Yes	4	Co-infection	997	0	No		4	2	1		0			0	0		0	0	0	0	0	0	0	0	0	0	0	2	0	0	0	0	0	0	0
Zhou	2020	retrospective cohort	China	ICU and non-ICU	1	191		Adults	62	26	32	50	0	No		Superinfection		1	Yes	28	28				0			0	0		0	0	0	0	0	0	0	0	0	0	0	0	0	0	0	0	0	0	0
Zhu	2020	retrospective cohort	China	ICU and non-ICU	1	257	11	Adults/Children	53.7	1.16	0	3	1	Yes	243	Co-infection	14	0	No			9	1	11	1	11	1	1	60	0	12	0	21	103	4	67	24	0	143	2	2	5	0	0	52	0	153	1	12
Zhang, G.	2020	case series	China	ICU and non-ICU	1	221	6	Adults	48.9	80	26	44	1	Yes	2	Co-infection and superinfections	219	1	Yes	19	21	2	1	6	1	6	1	0	0	1	0	0	0	0	0	0	0	0	0	0	0	0	0	0	0	0	0	0	0
Cheng	2020	retrospective cohort	China	ICU and non-ICU		212	13	Adults/Children	51		19		0	No	0	Superinfection	212	1	Yes	13	13			13	1					13
Falces-Romero	2020	retrospective cohort	Spain	ICU and non-ICU	1	10		Adults	80	70	7	7	0	No	0	Superinfection	10	1	Yes	10	10					10	1	1	10
Garcia-Menino	2021	case series	Spain	ICU	1	7	7	Adults	86	100		7	0	No	0	Superinfection	7	1	Yes	7	7			7	1						0	0	0	0	0	0	0	0	7	0	0	0	0	0	0	0	0	0	0
Garcia-Vidal	2021	prospective cohort	Spain	ICU and non-ICU	1	989	47	Adults	55.8	15		146	1	Yes	23	Co-infection	966	0	No	72	95	6	1	47	1	7	1	1	3	0	9	0	12	2	0	0	3	3	3	4	4	1	1	0	0	0	1	0	0
He Bing	2020	retrospective cohort	China	ICU and non-ICU		21	2	Adults/Children					1	Yes	6	Co-infection	15	0			6			2	1	4	1			6
Kolenda	2020	prospective cohort	France	ICU	1	99	17			100		99	1	Yes	15	Co-infection	84	0			15			17	1					0	0	0	7	4	0	0	0	0	0					0	0	0	0	0	0
Kumar	2021	retrospective cohort	USA	ICU and non-ICU	1	1573	48	Adults	57.9	31	247	480	0	No		Superinfection	1573	1	Yes	67	67	0	0	48	1	9	1			4	10	6	16	0	0	2	4	1	7	5							0
Mughal	2020	retrospective cohort	USA	ICU and non-ICU	1	129		Adults	62.8	30.2326	30	39	0	No		Superinfection	129	1	Yes	14	14									14
Ng K F	2020	case series	China	ICU and non-ICU	1	8	0	Children	25	25		2	1	Yes	3	Co-infection	5	0	No	0	3	5	1	0	0	0	0	0	0	0	0	0	0	0	0	0	0	0	0	0	0	0	0	0	0	1	0	0	1
Nori	2021	retrospective cohort	USA	ICU and non-ICU	1	152	112	Adults/Children	59	55.9211		85	1	Yes	91	Co-infection	61	0	No	0	91			112	1	3	1	1	1	10	18	9	49	0	0	0	4	2	11	2							0
Nucci	2020	retrospective cohort	Brazil	ICU and non-ICU	1	41		Adults	51.2	48.7805	20	20	1	Yes		Co-infection and superinfections	41	1	Yes		0					38	1	0	0	3										35
Obata	2020	retrospective cohort	USA	ICU and non-ICU	1	226	8	Adults	55.05	24.7788		56	1	Yes		Co-infection	226	0	No	0	0			8	1	8	1	1	4	1	1	0	3	0	0	0	1	2	1	4							0
Oliva	2020	case series	Italy	ICU and non-ICU	1	7	7	Adults	57	14.2857	0	1	1	Yes	7	Co-infection	0	0	No		7			7	1
Papamanoli	2020	retrospective cohort	USA	ICU and non-ICU	1	447		Adults	66	45.1902	115	202	0	No		Superinfection	447	1	Yes	48	48
Pettit	2020	retrospective cohort	USA	ICU and non-ICU	1	148	14	Adults	37.5	70.2703	48	104	0	No		Superinfection	148	1	Yes	23	23	1	1	14	1	2	1	1	1	0	3	1	6	0	0	1	1	0	0	0	0	0	0	0	0	0	0	0	0
Sogaard	2021	retrospective cohort	Switzerland	ICU and non-ICU	1	162	19	Adults	61.1	25.3086		41	1	Yes	6	Co-infection and superinfections	156	1	Yes	17	23	5	1	19	1	3	1	1	3	8	12	3	9	1	0	1	5	4	9	15	1	0	1	1	0	1	1	0	1
Soriano	2021	retrospective cohort	Spain	ICU	1	83	7	Adults	79	100	78	83	1	Yes	20	Co-infection and superinfections	63	1	Yes	43	63			7	1					0	1	0	2	0	0	0	0	0	0								0
Tang	2021	retrospective cohort	China	ICU and non-ICU	1	78	5	Adults/Children	53				1	Yes	11	Co-infection	67	0	No		11	4	1	5	1					0	0	0	0	0	0	0	0	0	0		0	0	4	0	0	0	0	0	0
Torrego	2020	retrospective cohort	Spain	ICU	1	163	18			100	139	163	0	No		Superinfection	163	1	Yes	18	18			18	1					0	7	2	0	0	0	0	1	0	0								1
Townsend	2020	prospective cohort	Ireland	ICU and non-ICU	1	117	6	Adults	63	29.0598		34	1	Yes	84	Co-infection	33	0	No		84			6	1	1	0	0	0	2	1	0	1	0	0	0	2	0	0	0							0
Verroken	2020	prospective cohort	Belgium	ICU	1	32	13			100		32	1	Yes	13	Co-infection	19	0	No		13			13	1					0	1	0	6	3	0	0	0	0	0								1
Wei L	2020	retrospective cohort	China	Non-ICU	1	43		Adults	0	0	0	0	1	Yes	12	Co-infection	31	0	No		12	15	1																		12	0	0	0	0	0		0	0
Wu Q	2020	retrospective cohort	China	Non-ICU	1	74	16	Children	59.5		1		1	Yes	19	Co-infection	55	0	No		19	10	1	16	1					0	0	0	0	0	16	0	0	0	0		1	1	3	0	3	0	0	0	0
Xia P	2020	retrospective cohort	China	ICU	1	81	34	Adults	66.7	100	66	81	0	No		Superinfection	81	1	Yes	34	34			34	1
Xu J	2020	retrospective cohort	China	ICU	1	239	25	Adults	59.8	100	165	239	0	No		Superinfection	239	1	Yes	25	25			25	1
Xu S	2020	retrospective cohort	China	ICU and non-ICU	1	64	10	Adults	0	1.5625		1	1	Yes	19	Co-infection	45	0	No		19	9	1	10	1										5							4		5
Xu W	2021	retrospective cohort	China	ICU and non-ICU	1	659	48	Adults/Children	50.4	5.00759		33	0	No		Superinfection	659	1	Yes	48	48			48	1
Yao T	2020	retrospective cohort	China	ICU and non-ICU	1	83	36	Adults	63.9		71		0	No		Superinfection	83	1	Yes	36	36			36	1
Yu C	2020	retrospective cohort	China	ICU and non-ICU		128	5	Adults	43				1	Yes	69	Co-infection	59	0	No		69	64	1	5	1					0	0	0	0	0	4	0	0	0	0		54	10	0	0	0	0	0	0	0
Yue H	2020	retrospective cohort	China	ICU and non-ICU		307		Adults	47.3				1	Yes	176	Co-infection	131	0	No		176	176	1																		153	23
Yusuf E	2021	case-control	Netherlands	ICU	1	92		Adults	76.1	100		92	1	Yes	10	Co-infection	82	0	No		10					10	1	1	10
Zhang C	2020	retrospective cohort	China	Non-ICU	1	34	9	Children	41				1	Yes	16	Co-infection	18	0	No		16	13	1	9	1					0	0	0	0	0	0	0	0	0	0		3	6	0	1	2	0	0	0	0
Zhang H	2020	retrospective cohort	China	ICU	1	38	37	Adults	84.21		23		0	No		Superinfection	38	1	Yes	22	22	0	0	37	1	3	1	1	3	2	1	0	3	0	2	8	0	1	10	0	0	0	0	0	0	0	0	0	0
Nasir N	2020	retrospective cohort	Pakistan	ICU and non-ICU	1	30	6	Adults	83	33	24	10	1	Yes	4	Co-infection and superinfections	26	1	Yes	12	16			6	1	7	1	1	7	0	2	0	1	0	0	3	0	0	0								0
Peci A	2021	cross-sectional	Canada	ICU and non-ICU	1	325		Adults/Children					1	Yes	8	Co-infection	317	0	No		8	8	1																		0	0	2	0	0	2		2	2
Pereira	2021	case control	New York	ICU and non-ICU	1	87	6	Adults	60.9195	48.2759		42	0	No		Superinfection	87	1	Yes	27	27	10	1	6	1	1	1	1	1	6										0
Pickens	2021	retrospective cohort	Chicago	ICU	1	179	28	Adults	61.5	100	179	179	0	No		Superinfection	179	1	Yes	28	28			28	1					0	0	0	13	2	0	0	0	1	1								3
Ramadan H	2021	prospective cohort	Egypt	ICU and non-ICU	1	260	37	Adults	55.4		8		1	Yes	37	Co-infection	223	0	No		37			37	1					0	4	2	5	0	0	7	4	0	12								0
Reig S	2020	retrospective cohort	Germany	ICU and non-ICU	1	213	26	Adults	61	33	57	70	0	No	0	Superinfection	213	1	Yes	26	26	0	0	26	1	6	1	1	6	0	0	0	0	0	0	0	0	0		0	0	0	0	0	0	0		0	0
Ripa M	2020	prospective cohort	Italy	ICU and non-ICU	1	731	24	Adults	68	12	0	86	0	No	0	Superinfection	731	1	Yes	24	24	0	0	24	1	11	1	1	11	0	6	0	0	0	0	7	5	0	0	0	0	0	0	0	0	0	0	0	0
Rothe K	2020	retrospective cohort	Germany	ICU and non-ICU	1	140		Adults	64	15	41	22	1	Yes	112	Co-infection	28	0	No	0	112	0	0		1	9	1	1	9	0	2	1	4	0	0	0	6	0	11	0	0	0	0	0	0	0	0	0	0
Segrelles-Calvo G	2021	case series	Spain	ICU and non-ICU	1	7	0	Adults	71	86	7	6	1	Yes	7	Co-infection	0	0	No	0	7	0	0	0	0	7	1	1	7	0	0	0	0	0	0	0	0	0	0	0	0	0	0	0	0	0	0	0	0
Sharifipour E	2020	prospective cohort	Iran	ICU	1	19	19	Adults	58	100	19	19	0	No	0	Superinfection	19	1	Yes	19	19	0	0	19	1	0	0	0	0	0	0	0	2	0	0	17	0	0	0	0	0	0	0	0	0	0	0	0	0
Wang L	2020	retrospective cohort	UK	ICU and non-ICU	1	1396	11	Adults	65	30		11	1	Yes	11	Co-infection	1385	0	No	0	11			11	1					0	0	0	0	0	0	0	0	0	0		0	0	0	0	0	0	0	0	0
White P	2020	retrospective cohort	UK	ICU and non-ICU	1	135		Adults	69				0	No	0	Superinfection	135	1	Yes	36	36					36	1	1	19	0	0	0	0	0	0	0	0	0	0	17	0	0	0	0	0	0	0	0	0
Alvares P	2020	retrospective cohort	Brazil	ICU and non-ICU	1	32	0	Children	59.3	9.3	2	3	1	Yes	5	Co-infection and superinfections	27	1	Yes	1	6	1	1	0	0																		6
Borman	2020	case series	UK	ICU	1	719		Adults		100			1	Yes	12	Co-infection	707	0	No		12		0			3	1	1	46
Chauhdary W	2020	case series	Brunei Darussalam	ICU and non-ICU	1	141	7	Adults					1	Yes	5	Co-infection	136	0	No		5	0	0	7	1	0	0		0	0	0	0	2	1	0	0	0	0	1	1
Cheng L	2020	retrospective cohort	Hong Kong	ICU and non-ICU	1	147	4	Adults	85	3			1	Yes	12	Co-infection and superinfections	135	1	Yes	8	20	0	0	4	1	0	0	0	0	0	1	0	8	3	0	0	0	0	1	0
Cheng Y	2020	retrospective cohort	China	ICU and non-ICU	1	213		Adults	50.2		2		1	Yes	97	Co-infection	116	0	No		97	97	1																		97
Contou D	2020	retrospective cohort	France	ICU	1	92	32	Adults	79	100	83		1	Yes	26	Co-infection	66	0	No		26	0	0	32	1						2	0	10	7	0	1	0	0	6	0	0	0	0	0	0	0	0	0	0
Dupont D	2020	case series	France	ICU	1	19		Adults	78	100	18	19	0	No		Superinfection	19	1	Yes	19	19		1		1	19	1	1	16
Elabbadi A	2020	case series	France	ICU	1	101	10	Adults	78.2	100	83	101	0	No	20	Superinfection	81	1	Yes	48	68		0	10	1	0	0	0	0		2	0	11	2	0	0	2	0	1	2	0	0	0	0	0	0	0	0	0
Falcone M	2020	prospective cohort	Italy	ICU and non-ICU	1	315	11	Adults	66.6	26.9	55	85	0	No		Superinfection	315	1	Yes	109	109	0	0	11	1	2	1	1	1	9	4	4	4	0	0	2	2	0	0	8	0	0	0	0	0	0	0	0	0
Fu Y	2020	case series	China	ICU and non-ICU	1	5	5	Adults	80	100	5	5	0	No		Superinfection	5	1	Yes	5	5		1	5	1	2	1	1	2	0	2	0	0	0	0	0	1	1	0	1	0	0	0	0	0	0	0	0	0
Gouzien	2020	retrospective cohort	France	ICU	1	53		Adults	67.9	100	53	53	0	No		Superinfection	53	1	Yes		0					1	1	1	3
Hashemi S	2020	case series	Iran	ICU and non-ICU	1	105		Adults/Children					1	Yes		Co-infection	105	0	No		0		1																0		23	0	8	4	0	0	0	3	0
Hazra A	2020	retrospective cohort	USA	ICU and non-ICU	1	459							1	Yes	364	Co-infection	95	0	No		364	6	1		0					0	0	0	0	0	0	0	0	0	0	0	3	0	0	1	0	1	0	2	8
Hirotsu Y	2020	prospective cohort	Japan	Non-ICU		191							0	No		Superinfection	191	1	Yes		0	32	1		0		0														0	0	2	0	0	9		7	11
Hughes	2020	case series	UK	ICU	1	836	5	Adults	62				1	Yes	21	Co-infection	815	0	No		21		0	5	1	27	1	1	3		12		6	1
Karaba	2020	retrospective cohort	USA	ICU and non-ICU	1	1016	1	Adults	54	12		118	1	Yes	12	Co-infection	1004	0	No		12	2	1	1	1	0	0	0	0		0		1	0	0	0	0	0	0	0	1	0	1	0	0	0	0	0	0
Lardaro T	2020	retrospective cohort	USA	ICU and non-ICU	1	542	8	Adults	49.6	15.9	159	85	1	Yes	20	Co-infection	522	0	No	0	20			8	1							1	5							1
Lehmann C	2020	retrospective cohort	USA	ICU and non-ICU	1	321	7	Adults	48	5			1	Yes	12	Co-infection	309	0	No		12	5	1	7	1	0		0	0	0	0	0	2	0	0	0	0	0		0	3	0	15	0	0	0	0	0	2
Lendorf	2020	retrospective cohort	Denmark	ICU and non-ICU	1	115	9	Adults/Children	60	18	12	20	1	Yes	14	Co-infection	101	0	No		14	0	0	9	1	1	1	0	0	0	1	0	4	2			5			1
Li J	2020	retrospective cohort	China	ICU and non-ICU	1	159	159	Adults/Children	66.7				0	No		Superinfection	159	1	Yes	102	102			159	1					5	7	6	3			57	8	10		49
Li Z	2020	retrospective cohort	China	ICU and non-ICU	1	32	10	Adults	62.5	40	6	13	1	Yes	14	Co-infection	18	0	No		14	6	1	10	1	2	1	1				1				2	1	3					1	1		2		1	1
Ma L	2020	retrospective cohort	China	ICU and non-ICU	1	250	2	Adults	46		5		1	Yes	39	Co-infection	211	0	No		39	4	1	2	1		0								11						2	1	12
Mahmoudi H	2020	cross-sectional	Iran	ICU and non-ICU	1	342	6	Adults					1	Yes	43	Co-infection	299	0	No		43			6	1						4		9				8
Mendes N	2020	retrospective cohort	USA	ICU and non-ICU	1	242	6	Adults	50.8		54		1	Yes	46	Co-infection	196	0	No		46			6	1												14
Nasir N	2020	retrospective cohort	Pakistan	ICU and non-ICU	1	142	9	Adults	60				0	No	9	Superinfection	133	1	Yes		9			9	1	1	1	1	9	1	2					2		2		1
[truncated: 22 more columns]
